# Supplementary material for: Binary mixtures of β-dodecylmaltoside (β-C12G2) with cationic and non-ionic surfactants: micelle and surface compositions
Source: Royal Society of Chemistry journal article supplement (doi:10.1039/b719014j), 2008-01-01
Supplement: b719014j.pdf [file b719014j.pdf]

## Binary Mixtures of $\beta$ -Dodecylmaltoside ( $\beta$ -C<sub>12</sub>G<sub>2</sub>) with Cationic and Non-Ionic Surfactants: Micelle and Surface Compositions

*Sandeep R. Patil*<sup>1</sup>, *Natalie Buchavzov*<sup>2</sup>, *Enda Carey*<sup>1</sup>, *Cosima Stubenrauch*<sup>1\*</sup>

<sup>1</sup> *University College Dublin, School of Chemical and Bioprocess Engineering,  
Belfield, Dublin 4, Ireland*

<sup>2</sup> *Universität zu Köln, Institut für Physikalische Chemie, Luxemburger Str. 116,  
D-50939 Köln, Germany*

**\*corresponding author:** Dr. habil. Cosima Stubenrauch, School of Chemical and Bioprocess Engineering UCD, Belfield, Dublin 4, Ireland, Tel.: +353-1-716-1923, Fax: +353-1-716-1177, e-mail: [<cosima.stubenrauch@ucd.ie>](mailto:cosima.stubenrauch@ucd.ie)

## Supplementary Information

### **Procedure to determine the surface composition from surface tension measurements**

Measuring the surface tension  $\sigma$  (a) as a function of the total surfactant concentration  $c$  for a binary surfactant mixture enables the calculation of the total adsorbed amount of the mixture ( $\Gamma_{\text{total}}$ ) at the surface and (b) as a function of the concentration of surfactant 2 keeping the concentration of surfactant 1 constant allows us to calculate the adsorbed amount of surfactant 2 at the surface. Hence the amount of surfactant 1 adsorbed at the surface can simply be evaluated by subtracting the amount of surfactant 2 adsorbed at the surface from the total adsorbed amount of the mixture ( $\Gamma_{\text{total}}$ ). This approach was the basis for the determination of the surfactant composition at the surface for both binary surfactant mixtures studied and will be described in detail in the following.

#### **i) $\beta$ -C<sub>12</sub>G<sub>2</sub> / C<sub>12</sub>TAB surfactant mixture**

In Fig.1 (left) the surface tensions  $\sigma$  are shown as a function of the total surfactant concentration  $c$  for the pure  $\beta$ -C<sub>12</sub>G<sub>2</sub>, the pure C<sub>12</sub>TAB, and for three surfactant mixtures at bulk mole fractions of  $\alpha_1 = 0.02, 0.50, \text{ and } 0.98$ . In Fig. 1 (right) the surface tensions of the surfactant mixtures measured as a function of the sugar surfactant concentration  $c(\beta\text{-C}_{12}\text{G}_2)$  at a constant C<sub>12</sub>TAB concentration  $c(\text{C}_{12}\text{TAB})$  are seen. All solid lines in Fig.1 are fits of the experimental data carried out with a second order polynomial. As mentioned above, these fits allow us to determine the total adsorbed amount at the cmc ( $\Gamma_{\text{total,cmc}}$ ) as well as the adsorbed amount of  $\beta$ -C<sub>12</sub>G<sub>2</sub> ( $\Gamma_{\text{C}_{12}\text{G}_2,\text{cmc}}$ ) at the cmc for the three mixtures. Subtracting  $\Gamma_{\text{C}_{12}\text{G}_2,\text{cmc}}$  from  $\Gamma_{\text{total,cmc}}$  leads to  $\Gamma_{\text{C}_{12}\text{TAB,cmc}}$ . For the pure surfactants, the total adsorbed amounts  $\Gamma_{\text{total,cmc}}$  were obtained by treating  $\beta$ -C<sub>12</sub>G<sub>2</sub> as non-ionic and C<sub>12</sub>TAB as ionic surfactant using eq S1 and eq S2, respectively.

It holds

$$\left( \frac{d\sigma}{d \ln c_{C_{12}G_2}} \right) = -RT \Gamma_{C_{12}G_2} \quad (S1)$$

and

$$\left( \frac{d\sigma}{d \ln c_{C_{12}TAB}} \right) = -2RT \Gamma_{C_{12}TAB} . \quad (S2)$$

For the mixtures, the total adsorbed amounts  $\Gamma_{\text{total,cmc}}$  and the adsorbed amounts of the individual components ( $\Gamma_{C_{12}G_2,\text{cmc}}$  and  $\Gamma_{C_{12}TAB,\text{cmc}}$ ) were obtained with eqs S3 and S4, assuming ideal bulk behaviour and neglecting the contribution of the ionic charge of  $C_{12}TAB$ .

It holds<sup>6</sup>

$$\left( \frac{d\sigma}{d \ln c_{C_{12}G_2}} \right)_{C_{12}TAB} = -RT \Gamma_{C_{12}G_2} \quad (S3)$$

and

$$\left( \frac{d\sigma}{d \ln c_{\text{total}}} \right)_{C_{12}TAB/C_{12}G_2} = -RT \Gamma_{\text{total}} . \quad (S4)$$

## ii) $\beta$ - $C_{12}G_2$ / $C_{12}E_6$ surfactant mixture

In Fig.S1 (left) the surface tension  $\sigma$  of a 1:1 mixture ( $\alpha_1 = 0.50$ ) is plotted as a function of the total surfactant concentration  $c$ . The slope at each single point of this curve gives us  $\Gamma_{\text{total}}$ . As an example the slope at a total surfactant concentration of  $1.0 \cdot 10^{-5}$  M is shown. At this concentration the bulk concentrations of both surfactants are  $5.0 \cdot 10^{-6}$  M. The next step is to fix one of the two bulk concentrations and vary the concentration of the second surfactant. In our case we measured the surface tension  $\sigma$  as a function of the total  $C_{12}E_6$  concentration at a constant  $\beta$ - $C_{12}G_2$  concentration of  $c(\beta\text{-}C_{12}G_2) = 5.0 \cdot 10^{-6}$  M (Fig.S1 (right)). Note that the highest  $\sigma$  value is  $65 \text{ mN m}^{-1}$ , which corresponds to the value of the pure  $\beta$ - $C_{12}G_2$  solution at

$c = 5.0 \cdot 10^{-6}$  M (see Fig.3 (left)). The slope of the  $\sigma$ - $c(\text{C}_{12}\text{E}_6)$  curve at a  $\text{C}_{12}\text{E}_6$  concentration of  $c(\text{C}_{12}\text{E}_6) = 5.0 \cdot 10^{-6}$  M gives us  $\Gamma_{\text{C}_{12}\text{E}_6}$ . Thus the adsorbed amount of  $\beta$ - $\text{C}_{12}\text{G}_2$  ( $\Gamma_{\text{C}_{12}\text{G}_2}$ ) for the 1:1 mixture at a total surfactant concentration of  $1.0 \cdot 10^{-5}$  M can simply be calculated by subtracting  $\Gamma_{\text{C}_{12}\text{E}_6}$  from  $\Gamma_{\text{total}}$ . This procedure was used to determine the surfactant composition at the surface for other mixing ratios all of which are represented in Fig.4.

**Table S1.** Critical micelle concentrations (cmc), total adsorbed amount at the cmc ( $\Gamma_{\text{total,cmc}}$ ) of the pure and the mixed surfactant systems, adsorbed amount of  $\beta$ -C<sub>12</sub>G<sub>2</sub> at the cmc ( $\Gamma_{\text{C12G2,cmc}}$ ) and adsorbed amount of C<sub>12</sub>TAB at the cmc ( $\Gamma_{\text{C12TAB,cmc}}$ ). Data are extracted from the  $\sigma$ - $c$  curves shown in Fig.1.  $\alpha_1$  is the bulk mole fraction of C<sub>12</sub>TAB in the mixture.  $X_1^\sigma$  ( $X_2^\sigma$ ) is the mole fraction of C<sub>12</sub>TAB ( $\beta$ -C<sub>12</sub>G<sub>2</sub>) in the mixed surface.

|                                                  |                     |                                                             |                                                                                                 |                                                             |                     |
|--------------------------------------------------|---------------------|-------------------------------------------------------------|-------------------------------------------------------------------------------------------------|-------------------------------------------------------------|---------------------|
| $\alpha_1$                                       | 1.00                | 0.98                                                        | <b>0.50</b>                                                                                     | 0.02                                                        | 0                   |
| cmc / M                                          | $1.5 \cdot 10^{-2}$ | $5.1 \cdot 10^{-3}$                                         | <b><math>3.0 \cdot 10^{-4}</math></b>                                                           | $1.5 \cdot 10^{-4}$                                         | $1.5 \cdot 10^{-4}$ |
| $\Gamma_{\text{total,cmc}} / \text{mol m}^{-2}$  | $3.9 \cdot 10^{-6}$ | $4.4 \cdot 10^{-6}$<br>( $2.2 \cdot 10^{-6}$ ) <sup>a</sup> | <b><math>4.0 \cdot 10^{-6}</math></b><br>( <b><math>2.0 \cdot 10^{-6}</math></b> ) <sup>a</sup> | $4.2 \cdot 10^{-6}$<br>( $2.1 \cdot 10^{-6}$ ) <sup>a</sup> | $4.2 \cdot 10^{-6}$ |
| $\Gamma_{\text{C12TAB,cmc}} / \text{mol m}^{-2}$ | $3.9 \cdot 10^{-6}$ | $1.8 \cdot 10^{-6}$                                         | <b><math>0.4 \cdot 10^{-6}</math></b>                                                           | negligible                                                  | 0                   |
| $\Gamma_{\text{C12G2,cmc}} / \text{mol m}^{-2}$  | 0                   | $2.6 \cdot 10^{-6}$                                         | <b><math>3.6 \cdot 10^{-6}</math></b>                                                           | $4.2 \cdot 10^{-6}$                                         | $4.2 \cdot 10^{-6}$ |
| $X_1^\sigma$                                     | 1.0                 | 0.4                                                         | <b>0.1</b>                                                                                      | negligible                                                  | 0                   |
| $X_2^\sigma$                                     | 0                   | 0.6                                                         | <b>0.9</b>                                                                                      | ~1.0                                                        | 1.0                 |

<sup>a</sup> Mixture was treated as if it were purely ionic. See text for further details.

The results reported in bold were evaluated by a combination of surface tension measurement and foam film measurements<sup>3</sup>

**Table S2.** Critical micelle concentrations (cmc) and total adsorbed amount at the cmc ( $\Gamma_{\text{total,cmc}}$ ) of the pure surfactants and the  $\beta$ -C<sub>12</sub>G<sub>2</sub> / C<sub>12</sub>E<sub>6</sub> mixed surfactant system. Data are extracted from the  $\sigma$ - $c$  curves shown in Fig.3 (left).  $\alpha_1$  is the bulk mole fraction of C<sub>12</sub>E<sub>6</sub> in the mixture.

|                                                 |                      |                      |                      |                      |                      |                      |
|-------------------------------------------------|----------------------|----------------------|----------------------|----------------------|----------------------|----------------------|
| $\alpha_1$                                      | 0.00                 | 0.20                 | 0.40                 | 0.50                 | 0.80                 | 1.00                 |
| cmc / M                                         | $1.5 \cdot 10^{-4}$  | $1.2 \cdot 10^{-4}$  | $1.1 \cdot 10^{-4}$  | $1.0 \cdot 10^{-4}$  | $8.5 \cdot 10^{-5}$  | $7.3 \cdot 10^{-5}$  |
| $\Gamma_{\text{total,cmc}} / \text{mol m}^{-2}$ | $4.20 \cdot 10^{-6}$ | $4.08 \cdot 10^{-6}$ | $3.93 \cdot 10^{-6}$ | $3.80 \cdot 10^{-6}$ | $3.75 \cdot 10^{-6}$ | $3.30 \cdot 10^{-6}$ |

## Figure Caption

**Figure S1.** Surface tension  $\sigma$  as a function of total surfactant concentration  $c$  for aqueous solutions of a 1:1 mixture ( $\alpha_1 = 0.5$ ) of  $\beta$ -C<sub>12</sub>G<sub>2</sub> and C<sub>12</sub>E<sub>6</sub> (left) and surface tension  $\sigma$  as a function of the total C<sub>12</sub>E<sub>6</sub> concentration at a constant  $\beta$ -C<sub>12</sub>G<sub>2</sub> concentration of  $c(\beta\text{-C}_{12}\text{G}_2) = 5.0 \cdot 10^{-6}$  M (right). All solid lines represent fits of the experimental data carried out with a polynomial of second order.

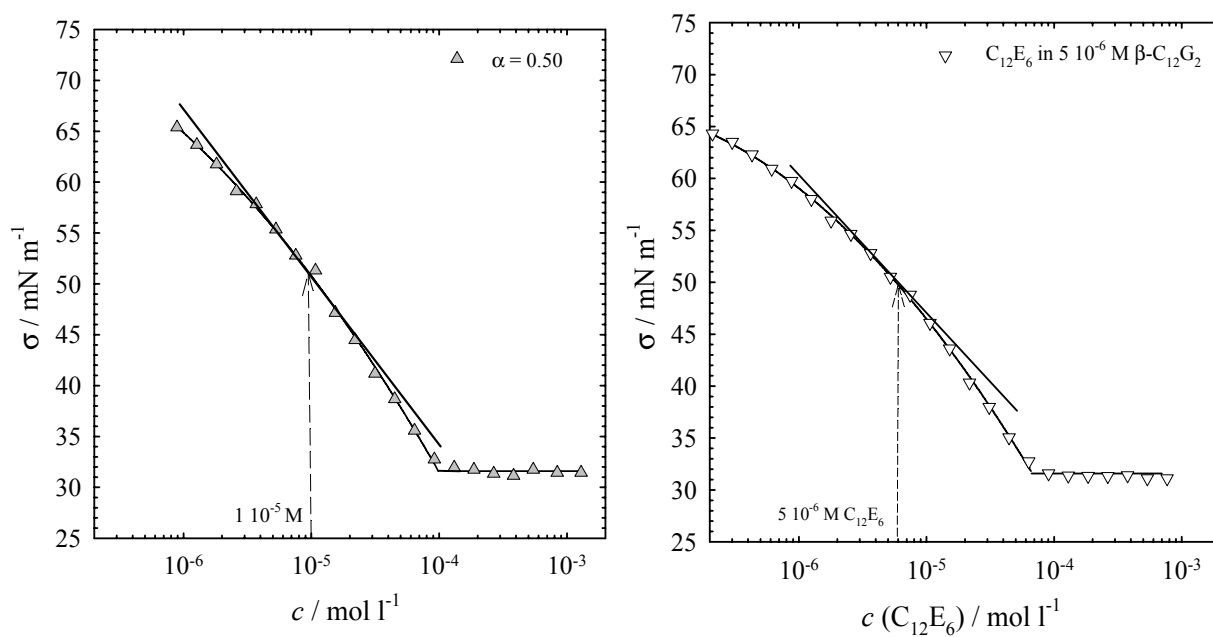

Figure S1. Patil, Buchavzov, Carey, Stubenrauch



## References:

- 3 N. Buchavzov and C. Stubenrauch, *Langmuir*, 2007, **23**, 5315.
- 6 M. K. Matsson, B. Kronberg and P. M. Claesson, *Langmuir*, 2005, **21**, 2766.
